# Supplementary material
Source: publisher site journal article supplement (https://www.degruyterbrill.com/publication/journal_key/OVS/downloadAsset/OVS_Invitation%20to%20become%20the%20Editor.pdf)
Supplement: Supplementary file 1 [file OVS_Invitation%20to%20become%20the%20Editor.pdf]

## OPEN VETERINARY SCIENCE

### Invitation to become the Editor

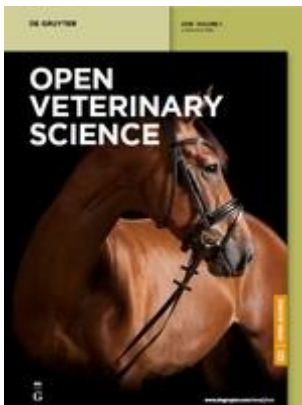

[Open Veterinary Science](#) is a new, peer-reviewed, open access journal published by [De Gruyter](#). It is devoted to scholarly research in all fields of veterinary medicine, as well as veterinary pharmacology, epidemiology, parasitology, microbiology, immunology and animal breeding, nutrition and ethology. The journal aims to become the leading and most recognizable journal in the field of veterinary science, as well as to facilitate the communication and collaboration of scientists across different countries.

Open Veterinary Science is currently looking for the Editorial Team members. The recruitment includes the positions of Section Editors, Assistant Editors, and Language Editors.

If you are interested in any of these positions - do not hesitate to [contact us](#)! We will be pleased to provide you more information about the journal and mentioned positions.

#### Editorial Contact

Jędrzej Daszkiewicz

Managing Editor

Open Veterinary Science

Jedrzej.Daszkiewicz@degruyter.com
